# Supplementary material for: Cost-effectiveness of home-based cardiac rehabilitation: a systematic review
Source: HighWire-hosted journal article supplement (doi:10.1136/heartjnl-2021-320459), 2023-02-27
Supplement: heartjnl-2021-320459supp001_data_supplement.pdf [file heartjnl-2021-320459supp001_data_supplement.pdf]

## A review of the cost-effectiveness of home-based cardiac rehabilitation

**Correspondence to:** gemma.shields@manchester.ac.uk

### Search strategies

Database: Ovid MEDLINE(R) and Epub Ahead of Print, In-Process, In-Data-Review & Other Non-Indexed Citations, Daily and Versions(R) <1946 to October 29, 2021>

Search Strategy:

- 
- 1 (cardiac adj rehab\$).mp.
  - 2 exp cardiovascular diseases/rh
  - 3 exp myocardial infarction/
  - 4 mi.tw.
  - 5 myocardial ischemia/
  - 6 exp angina pectoris/
  - 7 exp heart failure, congestive/
  - 8 exp heart defects, congenital/
  - 9 exp heart valve diseases/
  - 10 rheumatic heart disease/
  - 11 exp heart transplantation/
  - 12 angioplasty, transluminal, percutaneous coronary/
  - 13 ptca.tw.
  - 14 coronary disease/
  - 15 cardiovascular diseases/
  - 16 heart diseases/
  - 17 coronary artery bypass/
  - 18 cabg.tw.
  - 19 (heart adj disease\$).mp.
  - 20 (myocard\$ adj infarct\$).mp.
  - 21 coronary artery disease/
  - 22 acute coronary syndrome/
  - 23 percutaneous coronary intervention/

- 24 PCI.tw.
- 25 stent.tw.
- 26 unstable angina/
- 27 chronic heart failure/
- 28 CHF.tw.
- 29 implantable cardiac defibrillat\$.mp.
- 30 ICD.tw.
- 31 or/3-30
- 32 rehabilitation/
- 33 rehabilitation cent&.mp.
- 34 rehabilitation nursing/
- 35 rehab\$.tw.
- 36 or/32-35
- 37 1 or 2 or (31 and 36)
- 38 Economics/
- 39 exp "costs and cost analysis"/
- 40 Economics, Dental/
- 41 exp economics, hospital/
- 42 Economics, Medical/
- 43 Economics, Nursing/
- 44 Economics, Pharmaceutical/
- 45 (economic\$ or cost or costs or costly or costing or price or prices or pricing or pharmacoeconomic\$).ti,ab.
- 46 (expenditure\$ not energy).ti,ab.
- 47 value for money.ti,ab.
- 48 budget\$.ti,ab.
- 49 or/38-48
- 50 ((energy or oxygen) adj cost).ti,ab.
- 51 (metabolic adj cost).ti,ab.
- 52 ((energy or oxygen) adj expenditure).ti,ab.
- 53 or/50-52

- 54 49 not 53
- 55 letter.pt.
- 56 editorial.pt.
- 57 historical article.pt.
- 58 or/55-57
- 59 54 not 58
- 60 exp animals/ not humans/
- 61 59 not 60
- 62 limit 61 to yr="2006 -Current"
- 63 37 and 62**

\*\*\*\*\*

Database: Embase <1974 to 2021 October 29>

Search Strategy:

- 
- 1 (cardiac adj rehab\$).mp.
- 2 exp cardiovascular diseases/rh
- 3 exp myocardial infarction/
- 4 mi.tw.
- 5 myocardial ischemia/
- 6 exp angina pectoris/
- 7 exp heart failure, congestive/
- 8 exp heart defects, congenital/
- 9 exp heart valve diseases/
- 10 rheumatic heart disease/
- 11 exp heart transplantation/
- 12 angioplasty, transluminal, percutaneous coronary/
- 13 ptca.tw.
- 14 coronary disease/

- 15 cardiovascular diseases/
- 16 heart diseases/
- 17 coronary artery bypass/
- 18 cabg.tw.
- 19 (heart adj disease\$.mp.
- 20 (myocard\$ adj infarct\$.mp.
- 21 coronary artery disease/
- 22 acute coronary syndrome/
- 23 percutaneous coronary intervention/
- 24 PCI.tw.
- 25 stent.tw.
- 26 unstable angina/
- 27 chronic heart failure/
- 28 CHF.tw.
- 29 implantable cardiac defibrillat\$.mp.
- 30 ICD.tw.
- 31 or/3-30
- 32 rehabilitation/
- 33 rehabilitation cent&.mp.
- 34 rehabilitation nursing/
- 35 rehab\$.tw.
- 36 or/32-35
- 37 1 or 2 or (31 and 36)
- 38 Health Economics/
- 39 exp Economic Evaluation/
- 40 exp Health Care Cost/
- 41 pharmacoeconomics/
- 42 38 or 39 or 40 or 41
- 43 (econom\$ or cost or costs or costly or costing or price or prices or pricing or pharmacoeconomic\$.ti,ab.
- 44 (expenditure\$ not energy).ti,ab.

- 45 (value adj2 money).ti,ab.
- 46 budget\$.ti,ab.
- 47 43 or 44 or 45 or 46
- 48 42 or 47
- 49 letter.pt.
- 50 editorial.pt.
- 51 note.pt.
- 52 49 or 50 or 51
- 53 48 not 52
- 54 (metabolic adj cost).ti,ab.
- 55 ((energy or oxygen) adj cost).ti,ab.
- 56 ((energy or oxygen) adj expenditure).ti,ab.
- 57 54 or 55 or 56
- 58 53 not 57
- 59 animal/
- 60 exp animal experiment/
- 61 nonhuman/
- 62 (rat or rats or mouse or mice or hamster or hamsters or animal or animals or dog or dogs or cat or cats or bovine or sheep).ti,ab,sh.
- 63 59 or 60 or 61 or 62
- 64 exp human/
- 65 human experiment/
- 66 64 or 65
- 67 63 not (63 and 66)
- 68 58 not 67
- 69 conference abstract.pt.
- 70 68 not 69
- 71 limit 70 to yr="2006 -Current"
- 72 37 and 71

\*\*\*\*\*

Database: APA PsycInfo <1806 to October Week 4 2021>

Search Strategy:

- 
- 1 (cardiac adj2 rehab\$.ti,ab.
  - 2 (cardiovascular adj2 diseas\$.ti,ab.
  - 3 myocardial infarction.ti,ab.
  - 4 mi.mp.
  - 5 myocardial ischemia.ti,ab.
  - 6 angina pectoris.ti,ab.
  - 7 congestive heart failure.ti,ab.
  - 8 congenital heart defects\$.ti,ab.
  - 9 heart valve diseases.ti,ab.
  - 10 rheumatic heart disease.ti,ab.
  - 11 heart transplantation.ti,ab.
  - 12 angioplasty, transluminal, percutaneous coronary.ti,ab.
  - 13 ptca.mp.
  - 14 coronary disease.ti,ab.
  - 15 cardiovascular diseases.ti,ab.
  - 16 heart diseases.ti,ab.
  - 17 coronary artery bypass.ti,ab.
  - 18 cabg.mp.
  - 19 (heart adj2 disease\$.ti,ab.
  - 20 (myocard\$ adj2 infarct\$.ti,ab.
  - 21 coronary artery disease.ti,ab.
  - 22 acute coronary syndrome.ti,ab.
  - 23 percutaneous coronary intervention.ti,ab.
  - 24 PCI.mp.
  - 25 Stent.mp.
  - 26 unstable angina.ti,ab.

- 27 chronic heart failure.ti,ab.
- 28 CHF.mp.
- 29 implantable cardiac defibrillat\$.ti,ab.
- 30 ICD.mp.
- 31 or/3-30
- 32 rehabilitation.mp.
- 33 rehabilitation cent&.ti,ab.
- 34 rehabilitation nursing.ti,ab.
- 35 rehab\$.mp.
- 36 or/32-35
- 37 1 or 2 or (31 and 36)
- 38 "costs and cost analysis"/
- 39 "Cost Containment"/
- 40 (economic adj2 evaluation\$).ti,ab.
- 41 (economic adj2 analy\$).ti,ab.
- 42 (economic adj2 (study or studies)).ti,ab.
- 43 (cost adj2 evaluation\$).ti,ab.
- 44 (cost adj2 analy\$).ti,ab.
- 45 (cost adj2 (study or studies)).ti,ab.
- 46 (cost adj2 effective\$).ti,ab.
- 47 (cost adj2 benefit\$).ti,ab.
- 48 (cost adj2 utili\$).ti,ab.
- 49 (cost adj2 minimi\$).ti,ab.
- 50 (cost adj2 consequence\$).ti,ab.
- 51 (cost adj2 comparison\$).ti,ab.
- 52 (cost adj2 identificat\$).ti,ab.
- 53 (pharmacoeconomic\$ or pharmaco-economic\$).ti,ab.
- 54 or/38-53
- 55 (task adj2 cost\$).ti,ab,id.
- 56 (switch\$ adj2 cost\$).ti,ab,id.

- 57 (metabolic adj cost).ti,ab,id.
- 58 ((energy or oxygen) adj cost).ti,ab,id.
- 59 ((energy or oxygen) adj expenditure).ti,ab,id.
- 60 or/55-59
- 61 (animal or animals or rat or rats or mouse or mice or hamster or hamsters or dog or dogs or cat or cats or bovine or sheep or ovine or pig or pigs).ab,ti,id,de.
- 62 editorial.dt.
- 63 letter.dt.
- 64 dissertation abstract.pt.
- 65 or/61-64
- 66 54 not (60 or 65)
- 67 limit 66 to yr="2006 -Current"
- 68 37 and 67

\*\*\*\*\*



## CHEERS checklist

| Topic                                | No. | Item                                                                                                                            | Frederix (2016)    | Frederix (2017)    | Hwang (2019)       | Kidholm (2016)     | Kraal (2017)       | Niewada (2021)     | Taylor (2007)      | Maddison (2015)    | Maddison (2019)    |
|--------------------------------------|-----|---------------------------------------------------------------------------------------------------------------------------------|--------------------|--------------------|--------------------|--------------------|--------------------|--------------------|--------------------|--------------------|--------------------|
| <b>Title</b>                         | 1   | Identify the study as an economic evaluation and specify the interventions being compared.                                      | Fully reported     | Not reported       | Fully reported     | Partially reported | Fully reported     | Partially reported | Fully reported     | Partially reported | Partially reported |
| <b>Abstract</b>                      | 2   | Provide a structured summary that highlights context, key methods, results, and alternative analyses.                           | Partially reported | Partially reported | Fully reported     | Fully reported     | Fully reported     | Fully reported     | Partially reported | Partially reported | Partially reported |
| <b>Introduction</b>                  |     |                                                                                                                                 |                    |                    |                    |                    |                    |                    |                    |                    |                    |
| <b>Background and objectives</b>     | 3   | Give the context for the study, the study question, and its practical relevance for decision making in policy or practice.      | Fully reported     | Fully reported     | Fully reported     | Partially reported | Fully reported     | Partially reported | Fully reported     | Fully reported     | Fully reported     |
| <b>Methods</b>                       |     |                                                                                                                                 |                    |                    |                    |                    |                    |                    |                    |                    |                    |
| <b>Health economic analysis plan</b> | 4   | Indicate whether a health economic analysis plan was developed and where available.                                             | Not reported       |
| <b>Study population</b>              | 5   | Describe characteristics of the study population (such as age range, demographics, socioeconomic, or clinical characteristics). | Fully reported     | Not reported       | Fully reported     | Fully reported     |
| <b>Setting and location</b>          | 6   | Provide relevant contextual information that may influence findings.                                                            | Fully reported     | Fully reported     | Fully reported     | Partially reported | Partially reported | Fully reported     | Partially reported | Fully reported     | Partially reported |
| <b>Comparators</b>                   | 7   | Describe the interventions or strategies being compared and why chosen.                                                         | Fully reported     | Partially reported | Fully reported     | Partially reported | Fully reported     | Fully reported     | Fully reported     | Fully reported     | Partially reported |
| <b>Perspective</b>                   | 8   | State the perspective(s) adopted by the study and why chosen.                                                                   | Partially reported | Partially reported | Partially reported | Fully reported     | Partially reported | Fully reported     | Partially reported | Not reported       | Partially reported |
| <b>Time horizon</b>                  | 9   | State the time horizon for the study and why appropriate.                                                                       | Partially reported | Fully reported     | Partially reported | Partially reported | Partially reported |
| <b>Discount rate</b>                 | 10  | Report the discount rate(s) and reason chosen.                                                                                  | NA                 | Not reported       | NA                 | NA                 | NA                 | Fully reported     | NA                 | NA                 | NA                 |
| <b>Selection of outcomes</b>         | 11  | Describe what outcomes were used as the measure(s) of benefit(s) and harm(s).                                                   | Fully reported     |

|                                                         |    |                                                                                                                                                                               |                    |                    |                |                |                |                    |                    |                    |                    |
|---------------------------------------------------------|----|-------------------------------------------------------------------------------------------------------------------------------------------------------------------------------|--------------------|--------------------|----------------|----------------|----------------|--------------------|--------------------|--------------------|--------------------|
| <b>Measurement of outcomes</b>                          | 12 | Describe how outcomes used to capture benefit(s) and harm(s) were measured.                                                                                                   | Fully reported     | Fully reported     | Fully reported | Fully reported | Fully reported | Not reported       | Fully reported     | Fully reported     | Fully reported     |
| <b>Valuation of outcomes</b>                            | 13 | Describe the population and methods used to measure and value outcomes.                                                                                                       | Fully reported     | Partially reported | Fully reported | Fully reported | Fully reported | Partially reported | Partially reported | Fully reported     | Fully reported     |
| <b>Measurement and valuation of resources and costs</b> | 14 | Describe how costs were valued.                                                                                                                                               | Fully reported     | Fully reported     | Fully reported | Fully reported | Fully reported | Partially reported | Fully reported     | Partially reported | Fully reported     |
| <b>Currency, price date, and conversion</b>             | 15 | Report the dates of the estimated resource quantities and unit costs, plus the currency and year of conversion.                                                               | Partially reported | Partially reported | Fully reported | Fully reported | Fully reported | Partially reported | Fully reported     | Fully reported     | Fully reported     |
| <b>Rationale and description of model</b>               | 16 | If modelling is used, describe in detail, and why used. Report if the model is publicly available and where it can be accessed.                                               | NA                 | NA                 | NA             | NA             | NA             | Not reported       | NA                 | NA                 | NA                 |
| <b>Analytics and assumptions</b>                        | 17 | Describe any methods for analysing or statistically transforming data, any extrapolation methods, and approaches for validating any model used.                               | Fully reported     | Fully reported     | Fully reported | Fully reported | Fully reported | Not reported       | Partially reported | Fully reported     | Fully reported     |
| <b>Characterising heterogeneity</b>                     | 18 | Describe any methods used for estimating how the results of the study vary for subgroups.                                                                                     | Not reported       | Not reported       | Not reported   | Not reported   | Not reported   | Not reported       | Not reported       | Not reported       | Not reported       |
| <b>Characterising distributional effects</b>            | 19 | Describe how impacts are distributed across different individuals or adjustments made to reflect priority populations.                                                        | Not reported       | Not reported       | Not reported   | Not reported   | Not reported   | Not reported       | Not reported       | Not reported       | Not reported       |
| <b>Characterising uncertainty</b>                       | 20 | Describe methods to characterise any sources of uncertainty in the analysis.                                                                                                  | Not reported       | Not reported       | Fully reported | Fully reported | Fully reported | Partially reported | Partially reported | Partially reported | Partially reported |
| <b>Approach to engagement with patients and others</b>  | 21 | Describe any approaches to engage patients or service recipients, the general public, communities, or stakeholders (such as clinicians or payers) in the design of the study. | Not reported       | Not reported       | Not reported   | Not reported   | Not reported   | Not reported       | Not reported       | Not reported       | Not reported       |

|                                                                             |    |                                                                                                                                                                          |                    |                    |                    |                    |                    |                    |                    |                    |                    |
|-----------------------------------------------------------------------------|----|--------------------------------------------------------------------------------------------------------------------------------------------------------------------------|--------------------|--------------------|--------------------|--------------------|--------------------|--------------------|--------------------|--------------------|--------------------|
| affected by the study                                                       |    |                                                                                                                                                                          |                    |                    |                    |                    |                    |                    |                    |                    |                    |
| <b>Results</b>                                                              |    |                                                                                                                                                                          |                    |                    |                    |                    |                    |                    |                    |                    |                    |
| <b>Study parameters</b>                                                     | 22 | Report all analytic inputs (such as values, ranges, references) including uncertainty or distributional assumptions.                                                     | Partially reported | Partially reported | Fully reported     | Fully reported     | Partially reported | Partially reported | Fully reported     | Partially reported | Partially reported |
| <b>Summary of main results</b>                                              | 23 | Report the mean values for the main categories of costs and outcomes of interest and summarise them in the most appropriate overall measure.                             | Fully reported     | Partially reported | Fully reported     | Partially reported | Partially reported |
| <b>Effect of uncertainty</b>                                                | 24 | Describe how uncertainty about analytic judgments, inputs, or projections affect findings. Report the effect of choice of discount rate and time horizon, if applicable. | Partially reported | Partially reported | Fully reported     | Fully reported     | Fully reported     | Fully reported     | Fully reported     | Partially reported | Partially reported |
| <b>Effect of engagement with patients and others affected by the study</b>  | 25 | Report on any difference patient/service recipient, general public, community, or stakeholder involvement made to the approach or findings of the study                  | Not reported       |
| <b>Discussion</b>                                                           |    |                                                                                                                                                                          |                    |                    |                    |                    |                    |                    |                    |                    |                    |
| <b>Study findings, limitations, generalisability, and current knowledge</b> | 26 | Report key findings, limitations, ethical or equity considerations not captured, and how these could affect patients, policy, or practice.                               | Partially reported | Fully reported     | Fully reported     | Fully reported     | Partially reported | Partially reported | Partially reported | Partially reported | Partially reported |
| <b>Other relevant information</b>                                           |    |                                                                                                                                                                          |                    |                    |                    |                    |                    |                    |                    |                    |                    |
| <b>Source of funding</b>                                                    | 27 | Describe how the study was funded and any role of the funder in the identification, design, conduct, and reporting of the analysis                                       | Partially reported | Partially reported | Partially reported | Partially reported | Fully reported     | Fully reported     | Partially reported | Partially reported | Fully reported     |
| <b>Conflicts of interest</b>                                                | 28 | Report authors conflicts of interest according to journal or International Committee of Medical Journal Editors requirements.                                            | Fully reported     | Not reported       | Fully reported     | Fully reported     |
| NA – not applicable                                                         |    |                                                                                                                                                                          |                    |                    |                    |                    |                    |                    |                    |                    |                    |

From: Husereau D, Drummond M, Augustovski F, et al. Consolidated Health Economic Evaluation Reporting Standards 2022 (CHEERS 2022) Explanation and Elaboration: A Report of the ISPOR CHEERS II Good Practices Task Force. *Value Health* 2022;25. doi:10.1016/j.jval.2021.10.008

## Drummond checklist

| Figure 15.5.a: Drummond checklist (Drummond 1996) |                                                                                                                                             | Frederix (2016) | Frederix (2017) | Hwang (2019)    | Kidholm (2016)  | Kraal (2017)    | Niewada (2021)  | Taylor (2007)   | Maddison (2015) | Maddison (2019) |
|---------------------------------------------------|---------------------------------------------------------------------------------------------------------------------------------------------|-----------------|-----------------|-----------------|-----------------|-----------------|-----------------|-----------------|-----------------|-----------------|
| <b>Study design</b>                               |                                                                                                                                             |                 |                 |                 |                 |                 |                 |                 |                 |                 |
| 1                                                 | The research question is stated.                                                                                                            | Not clear       | Yes             |
| 2                                                 | The economic importance of the research question is stated.                                                                                 | Yes             | Yes             | Yes             | Not clear       | Yes             | Yes             | No              | Yes             | No              |
| 3                                                 | The viewpoint(s) of the analysis are clearly stated and justified.                                                                          | Not clear       | Not clear       | Yes             | Yes             | Yes             | Yes             | Not clear       | No              | Not clear       |
| 4                                                 | The rationale for choosing alternative programmes or interventions compared is stated.                                                      | Yes             | Not clear       | Yes             | Not clear       | Yes             | Yes             | Yes             | Yes             | Yes             |
| 5                                                 | The alternatives being compared are clearly described.                                                                                      | Yes             | Yes             | Yes             | Not clear       | Yes             | Yes             | Yes             | Yes             | Partly          |
| 6                                                 | The form of economic evaluation used is stated.                                                                                             | Yes             | No              | Yes             |
| 7                                                 | The choice of form of economic evaluation is justified in relation to the questions addressed.                                              | Not clear       | Not clear       | Not clear       | Not clear       | Yes             | Yes             | Yes             | Yes             | Yes             |
| <b>Data collection</b>                            |                                                                                                                                             |                 |                 |                 |                 |                 |                 |                 |                 |                 |
| 8                                                 | The source(s) of effectiveness estimates used are stated.                                                                                   | Yes             |
| 9                                                 | Details of the design and results of effectiveness study are given (if based on a single study).                                            | Yes             | Yes             | Yes             | Yes             | Yes             | Partly          | No              | Yes             | Yes             |
| 10                                                | Details of the methods of synthesis or meta-analysis of estimates are given (if based on a synthesis of a number of effectiveness studies). | Not appropriate |
| 11                                                | The primary outcome measure(s) for the economic evaluation are clearly stated.                                                              | Not clear       | Yes             |
| 12                                                | Methods to value benefits are stated.                                                                                                       | Yes             |
| 13                                                | Details of the subjects from whom valuations were obtained were given.                                                                      | Yes             | Yes             | Yes             | Yes             | Yes             | No              | Yes             | Yes             | Yes             |
| 14                                                | Productivity changes (if included) are reported separately.                                                                                 | Not appropriate | Not appropriate | Not appropriate | Not appropriate | Yes             | Not appropriate | Not appropriate | Not appropriate | Not appropriate |

|                                               |                                                                                          |                 |                 |                 |                 |                 |                 |                 |                 |                 |
|-----------------------------------------------|------------------------------------------------------------------------------------------|-----------------|-----------------|-----------------|-----------------|-----------------|-----------------|-----------------|-----------------|-----------------|
| 15                                            | The relevance of productivity changes to the study question is discussed.                | Yes             | Yes             | No              | No              | Yes             | Not appropriate | Not appropriate | Not appropriate | Not appropriate |
| 16                                            | Quantities of resource use are reported separately from their unit costs.                | Yes             | Yes             | No              | Yes             | Not clear       | No              | Yes             | No              | No              |
| 17                                            | Methods for the estimation of quantities and unit costs are described.                   | Yes             | Yes             | Yes             | Yes             | Not clear       | No              | Yes             | Not clear       | Not clear       |
| 18                                            | Currency and price data are recorded.                                                    | Yes             | Not clear       | Yes             | Yes             | Yes             | Partly          | Yes             | Yes             | Yes             |
| 19                                            | Details of currency of price adjustments for inflation or currency conversion are given. | Not appropriate | No              | No              | Yes             | Not appropriate | No              | Yes             | Yes             | Yes             |
| 20                                            | Details of any model used are given.                                                     | Not appropriate | Not appropriate | Yes             | Not appropriate |
| 21                                            | The choice of model used and the key parameters on which it is based are justified.      | Not appropriate | Not appropriate | Yes             | Not appropriate |
| <b>Analysis and interpretation of results</b> |                                                                                          |                 |                 |                 |                 |                 |                 |                 |                 |                 |
| 22                                            | Time horizon of costs and benefits is stated.                                            | Yes             |
| 23                                            | The discount rate(s) is stated.                                                          | Not appropriate | No              | Not clear       | Not appropriate | Not appropriate | Yes             | Not appropriate | Not appropriate | Not appropriate |
| 24                                            | The choice of discount rate(s) is justified.                                             | Not appropriate | No              | Yes             | Not appropriate | Not appropriate | No              | Not appropriate | Not appropriate | Not appropriate |
| 25                                            | An explanation is given if costs and benefits are not discounted.                        | No              | No              | Not appropriate | No              | No              | Yes             | Yes             | No              | Yes             |
| 26                                            | Details of statistical tests and confidence intervals are given for stochastic data.     | Yes             | Yes             | Yes             | Yes             | Yes             | Not clear       | Yes             | Not clear       | Not clear       |
| 27                                            | The approach to sensitivity analysis is given.                                           | No              | No              | Yes             |
| 28                                            | The choice of variables for sensitivity analysis is justified.                           | No              | No              | Yes             | Yes             | Not clear       | Not clear       | Yes             | Not clear       | No              |
| 29                                            | The ranges over which the variables are varied are justified.                            | Not appropriate | Not appropriate | Not clear       | Yes             | Yes             | Yes             | Not appropriate | Yes             | Not clear       |
| 30                                            | Relevant alternatives are compared.                                                      | Not clear       | No              | Yes             |
| 31                                            | Incremental analysis is reported.                                                        | Yes             | Yes             | Yes             | Yes             | Not clear       | Yes             | Yes             | Yes             | Not clear       |

|    |                                                                             |     |     |     |     |           |           |           |           |           |
|----|-----------------------------------------------------------------------------|-----|-----|-----|-----|-----------|-----------|-----------|-----------|-----------|
| 32 | Major outcomes are presented in a disaggregated as well as aggregated form. | Yes | Yes | Yes | Yes | Not clear |
| 33 | The answer to the study question is given.                                  | Yes | Yes | Yes | Yes | Yes       | Yes       | Yes       | Yes       | Not clear |
| 34 | Conclusions follow from the data reported.                                  | Yes | Yes | Yes | Yes | Yes       | Yes       | Not clear | No        | Not clear |
| 35 | Conclusions are accompanied by the appropriate caveats.                     | Yes | Yes | Yes | Yes | Yes       | Yes       | Yes       | Yes       | Yes       |

Included costs

|                         | Frederix et al. (2016) | Frederix et al. (2017) | Hwang et al. (2019) | Kidholm et al. (2016) | Kraal et al (2017) | Niewada et al. (2021) | Taylor et al. (2007) | Maddison et al. (2015) | Maddison et al. (2019) | Proportion of studies |
|-------------------------|------------------------|------------------------|---------------------|-----------------------|--------------------|-----------------------|----------------------|------------------------|------------------------|-----------------------|
| Healthcare costs        |                        |                        |                     |                       |                    |                       |                      |                        |                        |                       |
| Intervention            | ✓                      | ✓                      | ✓                   | ✓                     | ✓                  | ✓                     | ✓                    | ✓                      | ✓                      | 100% (9/9)            |
| Hospitalisation         | ✓                      | ✓                      | ✓                   | ✓                     | ✓                  |                       | ✓                    |                        | ✓                      | 78% (7/9)             |
| Outpatient              | ✓                      | ✓                      | ✓                   | ✓                     | ✓                  |                       |                      |                        | ✓                      | 56% (5/9)             |
| Primary/ community care |                        |                        |                     | ✓                     | ✓                  |                       | ✓                    |                        |                        | 33% (3/9)             |
| Medication              |                        |                        |                     | ✓                     | ✓                  |                       | ✓                    |                        | ✓                      | 33% (3/9)             |
| Other costs             |                        |                        |                     |                       |                    |                       |                      |                        |                        |                       |
| Patient out of pocket   | ✓                      | ✓                      |                     |                       |                    |                       | ✓                    |                        |                        | 22% (2/9)             |
| Productivity losses     |                        |                        |                     |                       | ✓                  |                       |                      |                        |                        | 11% (1/9)             |
| Informal care           |                        |                        |                     |                       | ✓                  |                       |                      |                        |                        | 11% (1/9)             |
